# Supplementary material
Source: Springer Nature journal article supplement (https://www.springermedizin.de/resource/supplementary/12889_2010_3836_MOESM1_ESM.pdf/9492182)

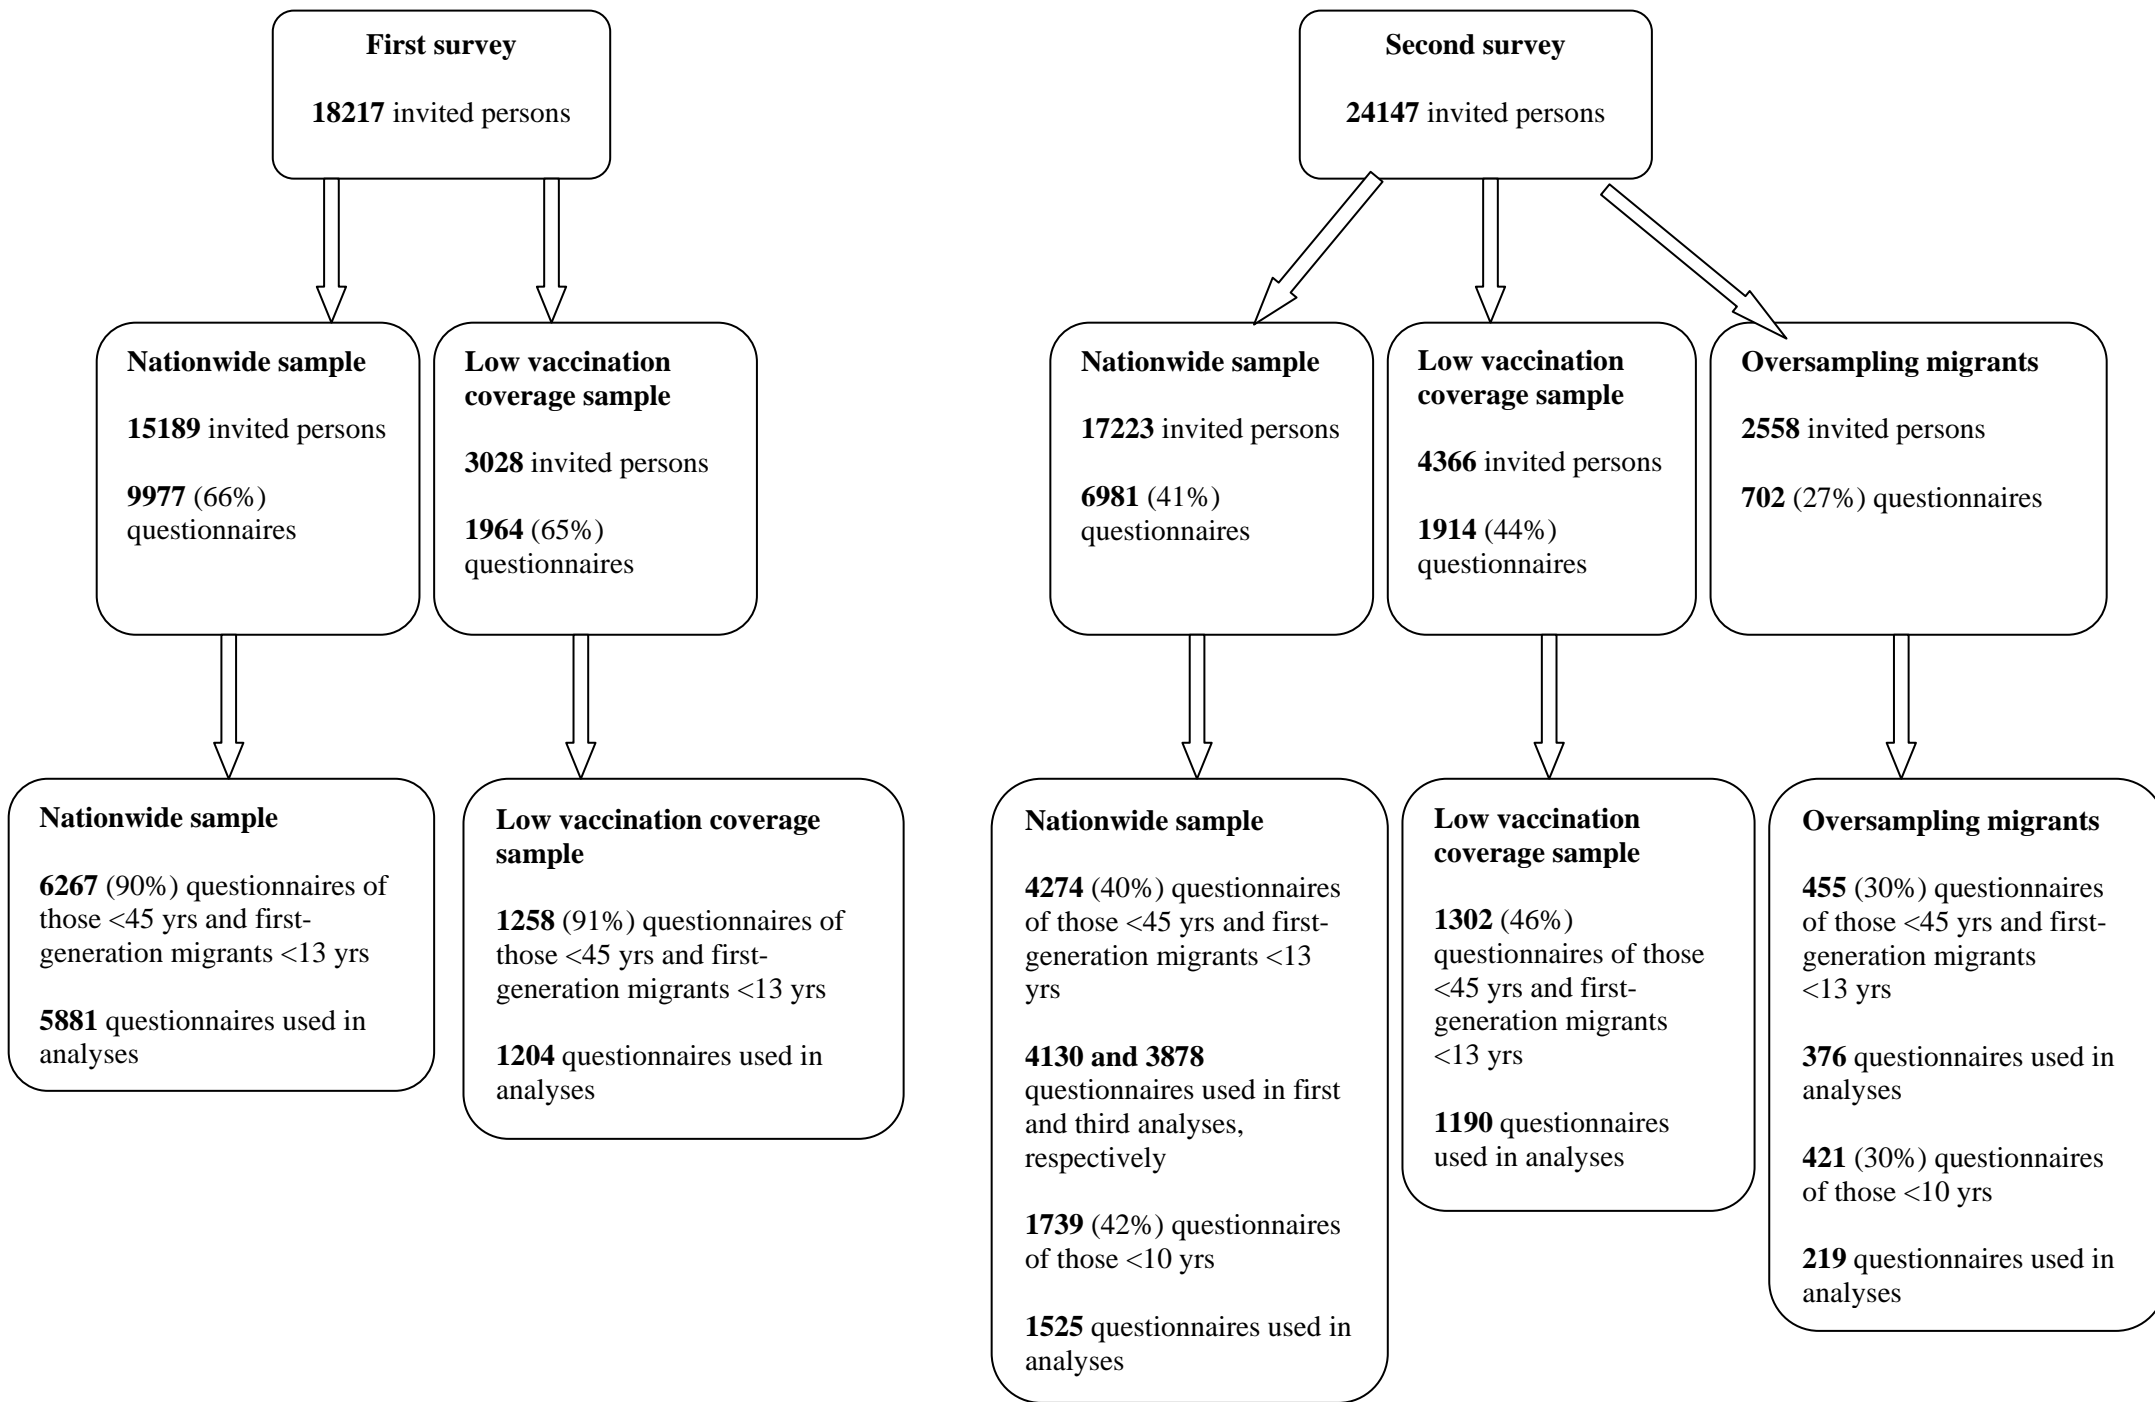

Supplement: MOESM1 [file 9492182]
